# Supplementary material for: Novel β-Hairpin Peptide from Marine Polychaeta with a High Efficacy against Gram-Negative Pathogens
Source: MDPI journal article supplement (doi:10.3390/md20080517), 2022-08-13
Supplement: s1 [file s1]

# *Supplementary Material*

## **Novel $\beta$ -Hairpin Peptide from Marine Polychaeta with a High Efficacy against Gram-Negative Pathogens**

**Victoria N. Safronova <sup>1</sup>, Ilia A. Bolosov <sup>1</sup>, Roman N. Kruglikov <sup>1</sup>, Olga V. Korobova <sup>2</sup>, Eugenia S. Pereskokova <sup>2</sup>,  
Alexander I. Borzilov <sup>2</sup>, Pavel V. Panteleev <sup>1,\*</sup> and Tatiana V. Ovchinnikova <sup>1,3,\*</sup>**

<sup>1</sup> M. M. Shemyakin & Yu. A. Ovchinnikov Institute of Bioorganic Chemistry, The Russian Academy of Sciences, Miklukho-Maklaya str., 16/10, 117997 Moscow, Russia;

<sup>2</sup> State Research Center for Applied Microbiology & Biotechnology (SRCAMB), 142279 Obolensk, Russia

<sup>3</sup> Department of Bioorganic Chemistry, Faculty of Biology, Lomonosov Moscow State University,  
119234 Moscow, Russia

\* Correspondence: [ibch@inbox.ru](mailto:ibch@inbox.ru) (P.V.P.); [ovch@ibch.ru](mailto:ovch@ibch.ru) (T.V.O.)

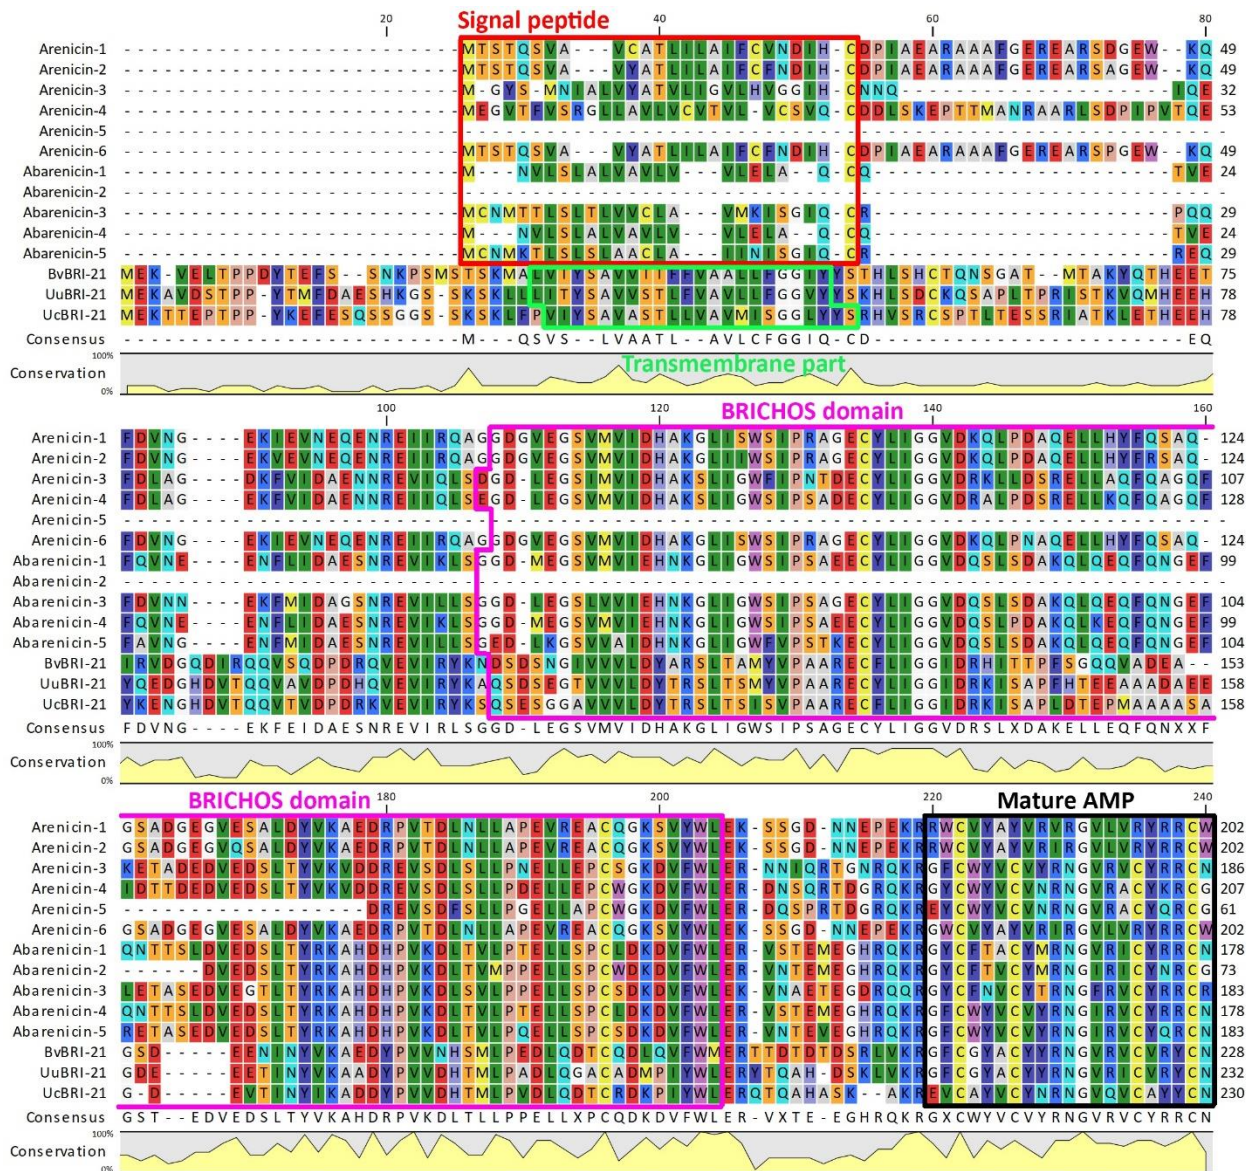

**Figure S1.** Amino acid sequence alignment of the precursors of arenicin-like BRICHOS-related AMPs. The alignment was constructed using CLC Sequence Viewer software (version 8.0). Signal peptide sequence identified with SignalP 5.0 (<https://services.healthtech.dtu.dk/service.php?SignalP-5.0>), transmembrane parts identified with TMHMM - 2.0 (<https://services.healthtech.dtu.dk/service.php?TMHMM-2.0>), and BRICHOS domain sequence identified with MyHits Motif Scan ([https://myhits.isb-sib.ch/cgi-bin/motif\\_scan](https://myhits.isb-sib.ch/cgi-bin/motif_scan)) are highlighted with red, green, and purple boxes, respectively. Mature peptide sequences are highlighted with black box.

**Table S1.** Characteristics of the recombinant AMPs.

| Peptide     | Hydrophobicity Index <sup>1</sup> | RP-HPLC Retention Time, min <sup>2</sup> | Recombinant Peptide Final Yield, mg/L | Calculated [M+H] <sup>+</sup> Monoisotopic Mass, Da <sup>3</sup> | Measured Monoisotopic m/z Value <sup>4</sup> |
|-------------|-----------------------------------|------------------------------------------|---------------------------------------|------------------------------------------------------------------|----------------------------------------------|
| Abarenicin* | -0.157                            | 25.77                                    | 5.1                                   | 2527.16                                                          | 2527.04                                      |
| Ap1         | -0.010                            | 26.05                                    | 5.9                                   | 2435.13                                                          | 2434.92                                      |
| Ap2         | -0.310                            | 24.29                                    | 6.2                                   | 2520.20                                                          | 2520.20                                      |
| Ap3         | -0.252                            | 25.47                                    | 5.1                                   | 2485.11                                                          | 2484.82                                      |
| Ap4         | -0.552                            | 24.79                                    | 8.4                                   | 2570.18                                                          | 2570.26                                      |
| Ap5         | -0.271                            | 25.53                                    | 4.4                                   | 2499.13                                                          | 2498.85                                      |
| Ap6         | -0.571                            | 24.69                                    | 7.2                                   | 2584.19                                                          | 2584.11                                      |
| Ap7         | -0.381                            | 25.61                                    | 8.2                                   | 2485.11                                                          | 2485.10                                      |
| Ap8         | -0.681                            | 24.34                                    | 11.2                                  | 2570.18                                                          | 2570.07                                      |
| Ap9         | -0.405                            | 25.37                                    | 5.8                                   | 2478.15                                                          | 2478.11                                      |
| Ap10        | -0.667                            | 24.41                                    | 8.2                                   | 2542.15                                                          | 2542.00                                      |
| Ap11        | -0.519                            | 25.17                                    | 4.9                                   | 2450.12                                                          | 2450.03                                      |
| UuBRI-21    | 0.029                             | 28.48                                    | 7.1                                   | 2476.08                                                          | 2476.26                                      |
| AA139       | 0.429                             | 25.67                                    | 7.2                                   | 2549.17                                                          | 2549.95                                      |

<sup>1</sup> Mean Kyte–Doolittle hydrophobicity index (GRAVY) was calculated using the Expasy ProtParam tool. The maximum and minimum values of this index are +4.5 and -4.5 for poly-Ile and poly-Arg sequences, respectively. <sup>2</sup> Retention times were measured using semipreparative reversed-phase high-performance liquid chromatography (RP-HPLC) on a C18 column with a linear gradient from 5 to 80% (v/v) acetonitrile in water containing 0.1% trifluoroacetic acid (TFA) within 50 minutes. <sup>3</sup> Molecular masses were calculated by considering the presence of four Cys residues forming two disulfide bonds. <sup>4</sup> Molecular masses were determined experimentally using MALDI-TOF mass spectrometry. \* - abarenicin-1[M9L]

**Table S2.** The data on analyzed transcriptomes from polychaeta

| <b>Animal</b>               | <b>Accession number</b> | <b># of reads</b> | <b>Sequencing platform</b> | <b>Sample information</b> |
|-----------------------------|-------------------------|-------------------|----------------------------|---------------------------|
| <i>Abarenicola pacifica</i> | SRX7658526              | 35,669,605        | Illumina HiSeq 2000        | Whole animal, mature      |
| <i>Arenicola marina</i>     | SRX1015734              | 68,660,484        | Illumina HiSeq 1000        | Whole animal, mature      |
| <i>Bonellia viridis</i>     | SRX1024222              | 45,343,168        | Illumina HiSeq 2000        | Whole animal, mature      |
| <i>Urechis unicinctus</i>   | SRX4526081              | 27,595,395        | Illumina HiSeq X Ten       | Whole animal, larvae      |
